# Supplementary material
Source: PubMed Central journal article supplement (PMC3043352)
Supplement: 97320630005300S1.pdf [file 97320630005300S1.pdf]

### Supplementary material:

**Table 1:** Mean scores given to each question of the eleven questions of the R-AMSTAR for the six included systematic reviews.

| <b>Acceptable Sampling Analysis based on R-AMSTAR</b>                                    |                |                 |                           |                       |                 |                           |                      |                    |                      |                  |                      |              |             |           |
|------------------------------------------------------------------------------------------|----------------|-----------------|---------------------------|-----------------------|-----------------|---------------------------|----------------------|--------------------|----------------------|------------------|----------------------|--------------|-------------|-----------|
| <b>Scores shown are the mean of the individual scores of the two independent readers</b> |                |                 |                           |                       |                 |                           |                      |                    |                      |                  |                      |              |             |           |
|                                                                                          | A Prior Design | Data Extraction | Comprehensive Lit. Search | Status of Publication | List of Studies | Chart of Included Studies | Method for Synthesis | Forming Conclusion | Method for Combining | Publication Bias | Conflict of Interest |              |             |           |
|                                                                                          | 1              | 2               | 3                         | 4                     | 5               | 6                         | 7                    | 8                  | 9                    | 10               | 11                   | <b>Total</b> | <b>Mean</b> | <b>SD</b> |
| <u>Vergnes et al, 2007</u>                                                               | 3.5            | 3.5             | 3.5                       | 3.5                   | 3.5             | 2.5                       | 3                    | 3                  | 4                    | 4                | 1.5                  | 35.5         | 3.23        | 0.72      |
| <u>Xiong et al, 2007</u>                                                                 | 2              | 1.5             | 3                         | 1                     | 1               | 3                         | 2.5                  | 2                  | 3                    | 1                | 1                    | 21           | 1.19        | 0.86      |
| <u>Vettore et al, 2006</u>                                                               | 3              | 1.5             | 3                         | 1                     | 1               | 2                         | 1                    | 4                  | 2                    | 1                | 1                    | 20.5         | 1.86        | 1.05      |
| <u>Xiong et al, 2006</u>                                                                 | 3              | 1.5             | 2                         | 1                     | 1               | 2                         | 3                    | 3                  | 4                    | 1                | 1                    | 22.5         | 2.05        | 1.06      |
| <u>Khader and Ta'ani, 2003</u>                                                           | 3              | 4               | 4                         | 1.5                   | 2.5             | 1.5                       | 1.5                  | 3                  | 4                    | 4                | 2                    | 31           | 2.82        | 1.08      |
| <u>Scannapieco et al, 2003</u>                                                           | 3              | 3               | 2                         | 1.5                   | 2               | 1                         | 2                    | 2                  | 2.5                  | 1                | 1                    | 21           | 1.91        | 0.74      |
| <b>Total</b>                                                                             | 17.5           | 15              | 17.5                      | 9.5                   | 11              | 12                        | 13                   | 17                 | 19.5                 | 12               | 7.5                  |              |             |           |
| <b>Mean</b>                                                                              | 2.92           | 2.50            | 2.92                      | 1.58                  | 1.83            | 2.00                      | 2.17                 | 2.83               | 3.25                 | 2.00             | 1.25                 |              |             |           |
| <b>SD</b>                                                                                | 0.49           | 1.14            | 0.80                      | 0.97                  | 1.03            | 0.71                      | 0.82                 | 0.75               | 0.88                 | 1.55             | 0.42                 |              |             |           |
